# Supplementary material for: The Predictive Value of the Oxford Acute Disease Severity Score for Clinical Outcomes in Patients with Acute Kidney Injury: A Secondary Analysis of a Large Prospective Observational Study
Source: Research Square preprint supplement (doi:10.21203/rs.3.rs-640541/v1), 2021-06-28
Supplement: Supplementary file 1 [file 5983c1c85ec8f26ac93a00ba.docx]

| Group | APACHEII | SAPSII | SOFA | OASIS |
| --- | --- | --- | --- | --- |
| AKI patients | 0.764* | 0.767 | 0.686* | **0.771*** |
| Elective | 0.640* | 0.598 | 0.554* | **0.674*** |
| Nonelective | **0.722*** | 0.733* | 0.712* | 0.720* |
| MV | **0.805*** | 0.783* | 0.693* | 0.802 |
| Non-MV | 0.646* | **0.718*** | 0.681* | 0.712* |
| Sepsis | 0.671* | **0.685*** | 0.630* | 0.682* |
| Nonsepsis | 0.739* | 0.743* | 0.661* | **0.760*** |
| RRT | 0.629* | 0.659* | 0.643* | **0.706*** |
| Non-RRT | 0.773* | **0.777*** | 0.661* | 0.771* |
| Over 65 years | 0.771* | 0.766* | 0.693* | **0.783*** |
| Up to 65 years | 0.734* | **0.740*** | 0.700* | 0.738* |

Table S3. Receiver operating characteristic curves of risk scores for predicting of 28-day mortality of AKI patients and each subgroup with AKI. * Denotes P >0.05 for Hosmer-Lemeshow test, reflecting good calibration. The risk score column in bold has the highest AUC value for each group.

AKI, acute kidney injury; AUC, area under the receiver operating characteristic curve; APACHE II, the Acute Physiology and Chronic Health Evaluation II; SAPS II, the Simplified Acute Physiology Score II; SOFA, the Sequential Organ Failure Assessment; OASIS, the Oxford Acute Severity of Illness Score; elective, elective surgery; MV, mechanical ventilation; RRT, renal replacement therapy.
